# Supplementary material for: Integrated Bioprocess for Cellulosic Ethanol Production from Wheat Straw: New Ternary Deep-Eutectic-Solvent Pretreatment, Enzymatic Saccharification, and Fermentation
Source: MDPI journal article supplement (doi:10.3390/fermentation8080371), 2022-08-05
Supplement: s1 [file s1]

Table S1 ANOVA analysis and principal effects for temperature (T)

| Effects                      |       | Sum of squares | d.f. <sup>a</sup> | Mean square | F-value   | p-value |
|------------------------------|-------|----------------|-------------------|-------------|-----------|---------|
| Solid Recovery (%)           | T     | 4392.690       | 3                 | 1464.230    | 27763.427 | <0.001* |
|                              | Error | 0.211          | 4                 | 0.053       |           |         |
|                              | Total | 4392.901       | 7                 |             |           |         |
| The content of cellulose (%) | T     | 1411.174       | 3                 | 470.391     | 3480.504  | <0.001* |
|                              | Error | 0.541          | 4                 | 0.135       |           |         |
|                              | Total | 1411.715       | 7                 |             |           |         |
| The content of xylan (%)     | T     | 294.433        | 3                 | 98.144      | 598.141   | <0.001* |
|                              | Error | 0.656          | 4                 | 0.164       |           |         |
|                              | Total | 295.089        | 7                 |             |           |         |
| The content of lignin (%)    | T     | 138.156        | 3                 | 46.052      | 276.061   | <0.001* |
|                              | Error | 0.667          | 4                 | 0.167       |           |         |
|                              | Total | 138.823        | 7                 |             |           |         |
| Cellulose Recovery (%)       | T     | 711.886        | 3                 | 237.295     | 1664.141  | <0.001* |
|                              | Error | 0.570          | 4                 | 0.143       |           |         |
|                              | Total | 712.456        | 7                 |             |           |         |
| Xylan Removal (%)            | T     | 2744.377       | 3                 | 914.792     | 0.732     | 0.585   |
|                              | Error | 5000.310       | 4                 | 1250.077    |           |         |
|                              | Total | 7744.687       | 7                 |             |           |         |
| Lignin Removal (%)           | T     | 9361.896       | 3                 | 3120.632    | 13070.529 | <0.001* |
|                              | Error | 0.955          | 4                 | 0.239       |           |         |
|                              | Total | 9362.851       | 7                 |             |           |         |
| Cellulose conversion (%)     | T     | 6976.229       | 3                 | 2325.410    | 2182.668  | <0.001* |
|                              | Error | 4.262          | 4                 | 1.065       |           |         |
|                              | Total | 6980.491       | 7                 |             |           |         |
| Glucose recovery (%)         | T     | 2596.289       | 3                 | 865.430     | 704.256   | <0.001* |
|                              | Error | 4.915          | 4                 | 1.229       |           |         |
|                              | Total | 2601.205       | 7                 |             |           |         |

<sup>a</sup> Degree of freedom

\*Significant

Table S2 ANOVA analysis and principal effects for concentration of substrate (S)

| Effects                     |       | Sum of squares | d.f. <sup>a</sup> | Mean square | F-value  | p-value |
|-----------------------------|-------|----------------|-------------------|-------------|----------|---------|
| Glucose concentration (g/L) | S     | 1364.691       | 3                 | 454.897     | 7335.112 | <0.001* |
|                             | Error | 0.248          | 4                 | 0.062       |          |         |
|                             | Total | 1364.939       | 7                 |             |          |         |
| Xylose concentration (g/L)  | S     | 3.598          | 3                 | 1.199       | 1986.614 | <0.001* |
|                             | Error | 0.002          | 4                 | 0.001       |          |         |
|                             | Total | 3.600          | 7                 |             |          |         |
| Cellulose conversion (%)    | S     | 0.031          | 3                 | 0.010       | 21.198   | 0.006   |
|                             | Error | 0.002          | 4                 | 0.000       |          |         |
|                             | Total | 0.033          | 7                 |             |          |         |
| Ethanol concentration (g/L) | S     | 244.284        | 3                 | 81.428      | 612.377  | <0.001* |
|                             | Error | 0.532          | 4                 | 0.133       |          |         |
|                             | Total | 244.816        | 7                 |             |          |         |

<sup>a</sup> Degree of freedom

\* Significant

Table S3 Components content from recycled DES pretreated WS.

| Cycle time | Solid<br>Recovery<br>(%) | Content (%) |       |        | Cellulose<br>Recovery<br>(%) | Xylan<br>Removal<br>(%) | Lignin<br>Removal<br>(%) |
|------------|--------------------------|-------------|-------|--------|------------------------------|-------------------------|--------------------------|
|            |                          | Cellulose   | Xylan | Lignin |                              |                         |                          |
| WS         | 100.00                   | 33.02       | 17.26 | 18.58  | -                            | -                       | -                        |
| 1st        | 45.8                     | 68.29       | 3.94  | 8.09   | 94.73                        | 89.53                   | 80.05                    |
| 2nd        | 49.70                    | 64.90       | 9.82  | 11.22  | 97.69                        | 75.11                   | 69.98                    |

Table S4 ANOVA analysis and principal effects for cellulase loadings (E)

| Effects                     |       | Sum of squares | d.f. <sup>a</sup> | Mean square | F-value  | p-value |
|-----------------------------|-------|----------------|-------------------|-------------|----------|---------|
| Glucose concentration (g/L) | E     | 457.677        | 3                 | 152.559     | 2207.255 | <0.001* |
|                             | Error | 0.276          | 4                 | 0.069       |          |         |
|                             | Total | 457.953        | 7                 |             |          |         |
| Xylose concentration (g/L)  | E     | 0.030          | 3                 | 0.010       | 0.161    | 0.917   |
|                             | Error | 0.246          | 4                 | 0.062       |          |         |
|                             | Total | 0.276          | 7                 |             |          |         |
| Cellulose conversion (%)    | E     | 0.051          | 3                 | 0.017       | 283.102  | <0.001* |
|                             | Error | 0.000          | 4                 | 0.000       |          |         |
|                             | Total | 0.051          | 7                 |             |          |         |
| Xylan conversion (%)        | E     | 0.006          | 3                 | 0.002       | 0.113    | 0.948   |
|                             | Error | 0.076          | 4                 | 0.019       |          |         |
|                             | Total | 0.083          | 7                 |             |          |         |

<sup>a</sup> Degree of freedom

\* Significant
